# Supplementary material for: Addressing Antimicrobial Stewardship in Primary Care—Developing Patient Information Sheets Using Co-Design Methodology
Source: MDPI journal article supplement (doi:10.3390/antibiotics12030458), 2023-02-24
Supplement: s1 [file s1]

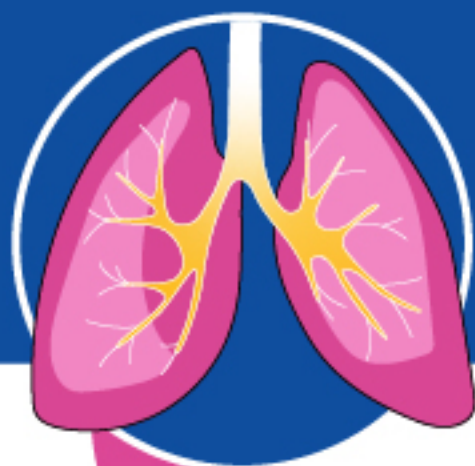

# ACUTE BRONCHITIS

Acute Bronchitis is an inflammation of the airways in your lungs, most commonly caused by a **viral infection**.

## How does it make you feel?

You **cough a lot** and there may be **phlegm** in your cough. You may hear a **wheezing sound** when you breathe. Your cough might **wake you at night**. You may also have a **blocked nose, sore throat, mild headache** or **fever**.

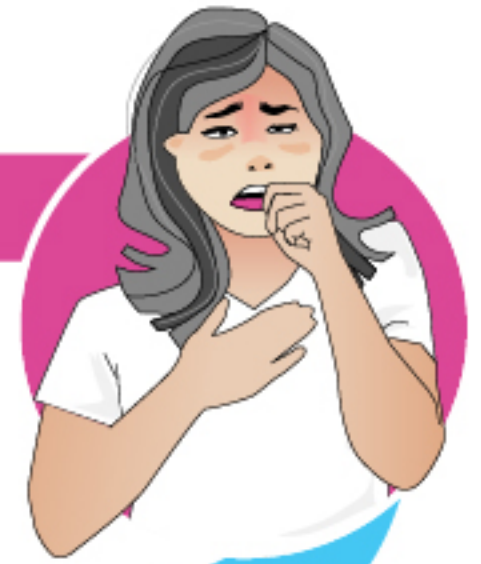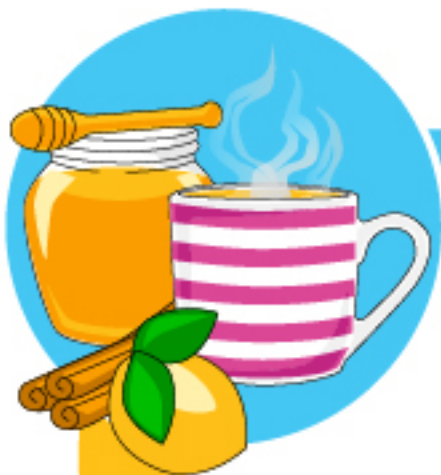

## What can you do to feel better?

**Light pain** relief such as **Panadol** and **Nurofen** might ease your sore throat or mild headache, while simple remedies such as **warm drinks, honey** or **cough lozenges** may soothe your throat and ease coughing. Some people find **Inhaling warm air** is helpful. Try to *avoid anything that irritates the airways*, such as cigarette smoke.

## Do you need to see a doctor?

Usually bronchitis can be managed without the need for a doctor, and the cough normally goes away after 2-3 weeks. See your doctor if your symptoms take longer than 3 weeks, you experience **shortness of breath, confusion, disorientation, shaking** or **chills**, or if you feel that you are getting worse or are worried.

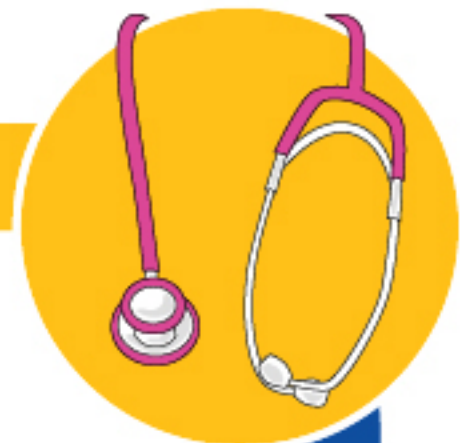

## Will antibiotics help?

**Not usually.** Antibiotics can't kill viruses like the ones that cause bronchitis. They are made to kill bacterial infections.

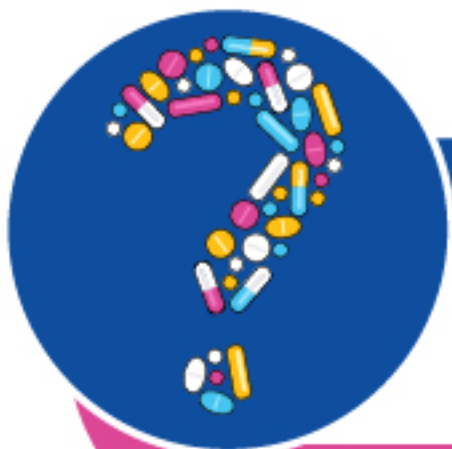

## How can I stop it spreading?

The viruses that cause bronchitis can be spread to others through droplets from your nose or mouth. To minimize this, **cover your mouth with your elbow when you cough**. **Wash your hands** if you have coughed into them, especially before touching other people. Dispose of tissues after use, and try to **stay away from crowded places** where you might risk exposing other people.

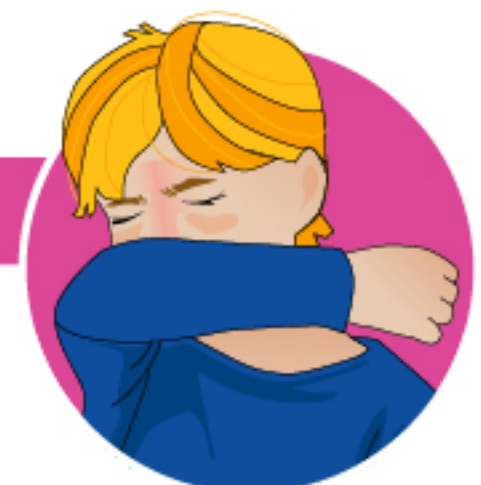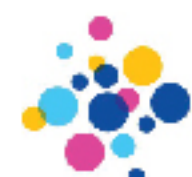

**NCAS**  
National Centre for  
Antimicrobial Stewardship
